# Supplementary material for: Refining the mechanism of CO2 and H2 activation over gold-ceria catalysts by IR modulation excitation spectroscopy
Source: Royal Society of Chemistry journal article supplement (doi:10.1039/d3cp05102a), 2024-01-01
Supplement: d3cp05102a1.pdf [file d3cp05102a1.pdf]

## Supporting Information

# Refining the mechanism of CO<sub>2</sub> and H<sub>2</sub> activation over gold-ceria catalysts by IR modulation excitation spectroscopy

Jakob Weyel, Christian Hess\*

Eduard-Zintl-Institute of Inorganic and Physical Chemistry, Technical University of Darmstadt,  
Peter-Grünberg-Str. 8, 64287 Darmstadt, Germany

\*email: christian.hess@tu-darmstadt.de

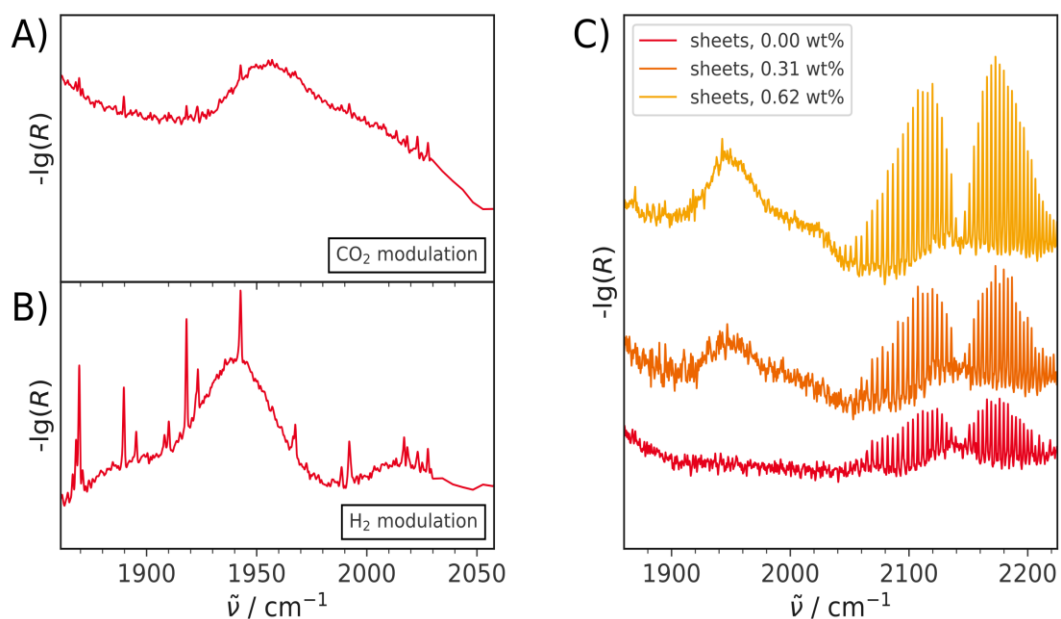

**Figure S1:** DRIFT spectra during RWGSR over Au/CeO<sub>2</sub>. **A)** Detail from Fig. 2, showing the PSD spectrum at 330 ° during CO<sub>2</sub> modulation after gas-phase removal. **B)** Detail from Fig. 3, showing the PSD spectrum at 300 ° during H<sub>2</sub> modulation after gas-phase removal. **C)** Conventional DRIFT spectra, recorded 6 min after adding CO<sub>2</sub> to a constant flow of H<sub>2</sub> (taken from ref. 7). For comparison, spectra of bare CeO<sub>2</sub> and for higher gold loading (0.62 wt%) are shown.
